# Supplementary material
Source: Elsevier journal article supplement (https://www.sciencedirect.com/science/article/pii/S0034935618300537)
Supplement: mmc1 [file S0034935618300537:mmc1.docx]

**Apéndice A**

**Características del FLUJO PULSÁTIL:**

La bomba de rodillo (Stockert S5®SorinGroup. München, Germany) permite la realización de flujo pulsátil, y puede operar de manera que suministra una curva de presión similar a la curva de presión fisiológica. Esta bomba consigue la curva pulsátil al cambiar la velocidad del rodillo del módulo de pulsatilidad. Es el único módulo que puede hacer que una bomba gire más rápido que su velocidad establecida, con un límite superior de 250 revoluciones por minuto (RPM) (la velocidad máxima de la bomba).

Tiene tres parámetros ajustables: la frecuencia del simulador, la anchura de pulso y el flujo base:

- La frecuencia del simulador es la velocidad de repetición del ciclo pulsátil. Es equivalente a la frecuencia cardiaca.
- La anchura de impulso es el porcentaje del ciclo "R-R" que la bomba está
  girando en su parte de mayor velocidad.
- El flujo base es el porcentaje del ciclo en que la bomba gira en su porción de velocidad más lenta.

La velocidad máxima de la bomba durante la fase de mayor velocidad se  calcula utilizando la siguiente fórmula:

PS = CS + [(CS - (CS x BF)) x (100 - PW)) / PW]

Donde PS = velocidad de pico, CS = velocidad continua, BF = flujo base y PW = Anchura de pulso. Los valores de flujo se pueden sustituir por PS y CS.

El módulo PFC S5 intentará aumentar la velocidad máxima proporcionalmente disminuyendo el porcentaje del flujo de base o el ancho del pulso. Cuando la bomba tiene que funcionar a más de 250 RPM para mantener el flujo, vuelve a modo continuo.

Pies de figuras:

Figura 1:

Medición del índice de resistencia (IR) y del tiempo de aceleración. Valores normales: Tiempo de aceleración <70 ms, Índice de resistencia ≤ 0.7.

Figura 2:

A: Doppler renal T 1 (PreCEC) , B: Doppler renal T2 CEC A50F50, C: Doppler renal T4 A30 F30

CEC= Circulación extracorporea. A= Amplitud. F: Flujo base

Figura 3:

Box plot del Índice de Resistencia medido según la modalidad ecográfica.

CEC= Circulación extracorporea. A= Amplitud. F: Flujo base.
